# Supplementary material
Source: PubMed Central journal article supplement (PMC2838276)
Supplement: supp_M109.045906_jbc.M109.045906-1.pdf [file supp_M109.045906_jbc.M109.045906-1.pdf]

Fig Sup 1

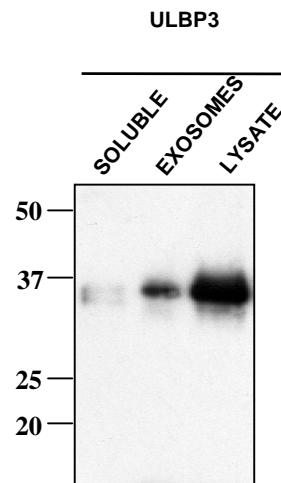

**Supplementary Figure 1. ULBP3 is released in exosomes in CV1-ULBP3 transfectants.** Exosome preparations from CV1-ULBP3 transfectants were performed by collecting tissue culture supernatant after 24 hours in culture as described in experimental procedures. The exosome fraction and the soluble proteins, remaining soluble in the supernatant after centrifugation at 100000 g, were compared with total lysate from the same cells by analysis in western blot. ULBP3 was detected as soluble protein and strongly released in exosomes.

**A. CV1 ULBP2**

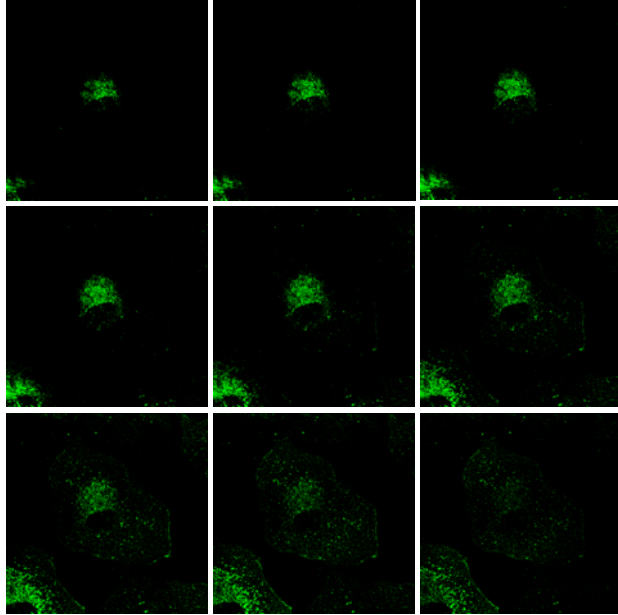

Sup Fig 2

**B. CV1 ULBP3**

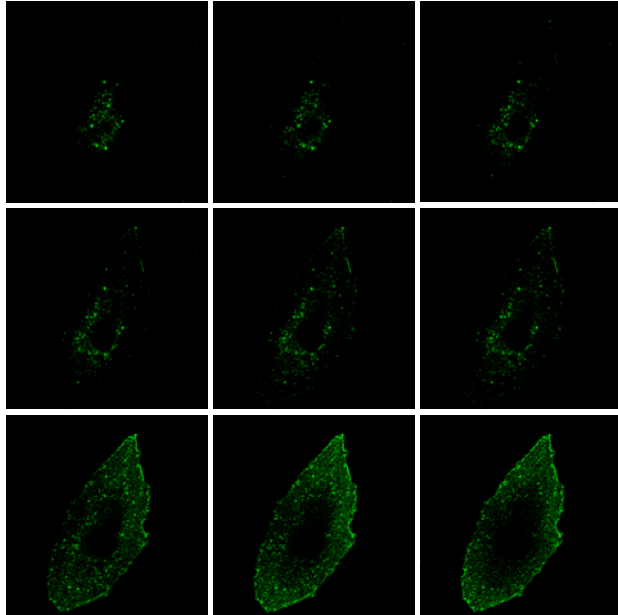

**Supplementary Figure 2.** Confocal microscopy analysis of CV1-ULBP2 (A) and -ULBP3 (B) transfectants. The series of single focal planes show the same cells shown in figure 3D, using the 63 $\times$  objective.
